# Supplementary material for: Chronic Inflammatory Status Observed in Patients with Type 2 Diabetes Induces Modulation of Cytochrome P450 Expression and Activity
Source: MDPI journal article supplement (doi:10.3390/ijms22094967), 2021-05-07
Supplement: s1 [file s1]

### Supplementary Material:

Supplementary Table 1: Drugs mentioned in the paper with their clinical indications and P450 metabolism pathways.

| Drugs        | Clinical uses                                                                                                                                                         | Mechanism of action                                                                                                                                                                                                                                               | P450 metabolism            | References |
|--------------|-----------------------------------------------------------------------------------------------------------------------------------------------------------------------|-------------------------------------------------------------------------------------------------------------------------------------------------------------------------------------------------------------------------------------------------------------------|----------------------------|------------|
| Verapamil    | 1- Angina<br>2- Arrhythmia<br>3- Hypertension                                                                                                                         | 1- Relaxation and prevention of coronary artery spasm and reducing oxygen utilization<br>2- Decreasing the influx of calcium, prolonging the effective refractory period within the AV node and slows AV conduction<br>3- Decreasing systemic vascular resistance | CYP3A4, CYP2C9 and CYP1A2  | [1]        |
| Lidocaine    | 1- Production of local or regional anesthesia<br>2- Ventricular arrhythmias                                                                                           | 1- stabilizes the neuronal membrane by inhibiting the ionic fluxes required for the initiation and conduction of impulses<br>2- Increasing the electric stimulation threshold of the ventricle during diastole                                                    | CYP1A2 and CYP3A4          | [2,3]      |
| Theophylline | 1- Prophylaxis and chronic treatment of asthma<br>2- Acute exacerbations associated with asthma and other chronic lung diseases                                       | Smooth muscle relaxation and suppression of the response of the airways to stimuli, by the inhibition of phosphodiesterase III                                                                                                                                    | CYP1A2                     | [4,5]      |
| Diclofenac   | 1- Osteoarthritis<br>2- Rheumatoid arthritis<br>3- Ankylosing spondylitis<br>4- Primary dysmenorrhea<br>5- Relief of mild to moderate pain                            | Prostaglandin synthetase inhibition                                                                                                                                                                                                                               | CYP2C9                     | [6]        |
| Nateglinide  | Improve glycemic control in adults with T2DM                                                                                                                          | Stimulating insulin secretion from the pancreas by interacting with ATP-sensitive potassium (K+ATP) channel on pancreatic beta-cells                                                                                                                              | CYP2C9                     | [7]        |
| Phenytoin    | 1- Generalized tonic-clonic (grand mal) seizures<br>2- Complex partial seizures<br>3- Prevention and treatment of seizures occurring during or following neurosurgery | Causes voltage-dependent block of voltage gated sodium channels. This block sustains high frequency repetitive firing of action potentials.                                                                                                                       | CYP3A4, CYP2C9 and CYP2C19 | [8]        |
| Midazolam    | 1- Acute treatment of intermittent, stereotypic episodes of frequent seizure activity<br>2- Preoperative sedation/anesthesia/ anxiolysis/amnesia                      | Potentiation of GABAergic neurotransmission resulting from binding at the benzodiazepine site of the GABA receptor                                                                                                                                                | CYP3A4                     | [9,10]     |

|                  |                                                                                                                 |                                                                                                                                                                                                                                                                 |                                    |         |
|------------------|-----------------------------------------------------------------------------------------------------------------|-----------------------------------------------------------------------------------------------------------------------------------------------------------------------------------------------------------------------------------------------------------------|------------------------------------|---------|
| Glyburide        | Improve glycemic control in adults with T2DM                                                                    | Increasing the secretion of insulin from beta cells in the pancreas                                                                                                                                                                                             | CYP2C9                             | [11]    |
| Repaglinide      | Improve glycemic control in adults with T2DM                                                                    | Stimulate the release of insulin from the pancreas by closing ATP-dependent potassium channels in the $\beta$ -cell membrane                                                                                                                                    | CYP3A4 and CYP2C8                  | [12]    |
| Bupropion        | 1- Treatment of major depressive disorder<br>2- Aid in smoking cessation treatment                              | Dual inhibition of norepinephrine and dopamine reuptake                                                                                                                                                                                                         | CYP2D6, CYP2C19 and CYP2B6         | [13]    |
| Omeprazole       | 1- Treatment of duodenal ulcer and gastric ulcer<br>2- Treatment of GERD                                        | Proton pump inhibitor, suppress gastric acid secretion by specific inhibition of the $H^+$ / $K^+$ ATPase enzyme system at the secretory surface of the gastric parietal cell                                                                                   | CYP3A4 and CYP2C19                 | [14]    |
| Atorvastatin     | 1- Reduce elevated total-C, LDL-C<br>2- Reduce the risk of MI, stroke, revascularization procedures, and angina | Selective, competitive inhibitor of HMG-CoA reductase, the rate-limiting enzyme that converts 3-hydroxy-3 methylglutaryl-coenzyme A to mevalonate, a precursor of sterols, including cholesterol                                                                | CYP3A4                             | [15]    |
| Nisoldipine      | Treatment of hypertension                                                                                       | Dihydropyridine class of calcium channel antagonists, inhibits the transmembrane influx of calcium into vascular smooth muscle and cardiac muscle                                                                                                               | CYP3A4                             | [16]    |
| Cyclosporine     | Prophylaxis of organ rejection in kidney, liver, and heart allogeneic transplants                               | Calcineurin-inhibitor immunosuppressant<br>Inhibition of the production of cytokines involved in the regulation of T-cell activation. In particular, inhibits the transcription of interleukin 2.                                                               | CYP3A4                             | [17]    |
| Tacrolimus       | Prophylaxis of organ rejection in kidney, liver, and heart allogeneic transplants                               | Calcineurin-inhibitor immunosuppressant<br>Binds to an intracellular protein, FKBP-12. A complex of tacrolimus-FKBP-12 is then formed, after which the phosphatase activity of calcineurin inhibited. As well as inhibiting the expression of several cytokines | CYP3A4                             | [18]    |
| Clopidogrel      | 1- Acute coronary syndrome<br>2- Recent MI, recent stroke, or established peripheral arterial disease           | P2Y12 platelet inhibitor, inhibitor of platelet activation and aggregation through the irreversible binding of its active metabolite to the P2Y12 class of ADP receptors on platelets                                                                           | CYP2C19, CYP3A4, CYP2B6 and CYP1A2 | [19]    |
| Tolbutamide      | Improve glycemic control in adults with T2DM                                                                    | Increasing the secretion of insulin from beta cells in the pancreas                                                                                                                                                                                             | CYP2C9                             | [20]    |
| Dextromethorphan | 1- Temporarily relieve cough<br>2- PBA, in combination with quinidine sulfate                                   | Sigma-1 receptor agonist and an uncompetitive NMDA receptor antagonist                                                                                                                                                                                          | CYP2D6                             | [21,22] |

|               |                                                                                                                       |                                                                                                                                                                                        |                                    |      |
|---------------|-----------------------------------------------------------------------------------------------------------------------|----------------------------------------------------------------------------------------------------------------------------------------------------------------------------------------|------------------------------------|------|
| Chlorzoxazone | Skeletal muscle relaxant                                                                                              | Act at the spinal cord and subcortical levels of the brain to inhibit multisynaptic reflex arcs involved in producing and maintaining muscle spasms.                                   | CYP2E1                             | [23] |
| Prasugrel     | Reduction of thrombotic cardiovascular events in patients with acute coronary syndrome who are to be managed with PCI | P2Y12 platelet inhibitor, inhibitor of platelet activation and aggregation through the irreversible binding of its active metabolite to the P2Y12 class of ADP receptors on platelets. | CYP3A4, CYP2B6, CYP2C9 and CYP2C19 | [24] |
| Ticagrelor    | Reduction of thrombotic cardiovascular events in patients with acute coronary syndrome who are to be managed with PCI | P2Y12 platelet inhibitor, inhibitor of platelet activation and aggregation through the irreversible binding of its active metabolite to the P2Y12 class of ADP receptors on platelets. | CYP3A4                             | [25] |

*Abbreviations:* ADP; adenosine diphosphate, AV; atrioventricular, C; cholesterol, GRED; gastroesophageal reflux disease, HMG-CoA; 3-hydroxy-3-methylglutaryl-CoA, MI; myocardial infarct, NMDA; N-methyl-D-aspartate, PBA; Pseudobulbar affect, PCI; percutaneous coronary intervention, T2D; type 2 diabetes

## References

- Available online: [https://www.accessdata.fda.gov/drugsatfda\\_docs/label/2016/018925s010lbl.pdf](https://www.accessdata.fda.gov/drugsatfda_docs/label/2016/018925s010lbl.pdf) Accessed on 01 April 2021.
- Available online: [https://www.accessdata.fda.gov/drugsatfda\\_docs/label/2010/006488s074lbl.pdf](https://www.accessdata.fda.gov/drugsatfda_docs/label/2010/006488s074lbl.pdf) Accessed on 01 April 2021.
- Bill, T.J.; Clayman, M.A.; Morgan, R.F.; Gampper, T.J. Lidocaine metabolism pathophysiology, drug interactions, and surgical implications. *Aesthet. Surg. J.* **2004**, *24*, 307–311.
- Available online: [https://www.accessdata.fda.gov/drugsatfda\\_docs/label/2011/022052s009lbl.pdf](https://www.accessdata.fda.gov/drugsatfda_docs/label/2011/022052s009lbl.pdf) Accessed on 01 April 2021.
- Barnes, P.J. Theophylline. *Pharmaceuticals (Basel)* **2010**, *3*, 725–747.
- Available online: [https://www.accessdata.fda.gov/drugsatfda\\_docs/label/2011/020142s021s022lbl.pdf](https://www.accessdata.fda.gov/drugsatfda_docs/label/2011/020142s021s022lbl.pdf) Accessed on 01 April 2021.
- Available online: [https://www.accessdata.fda.gov/drugsatfda\\_docs/label/2017/021204s015lbl.pdf](https://www.accessdata.fda.gov/drugsatfda_docs/label/2017/021204s015lbl.pdf) Accessed on 01 April 2021.
- Available online: [https://www.accessdata.fda.gov/drugsatfda\\_docs/label/2009/084349s060lbl.pdf](https://www.accessdata.fda.gov/drugsatfda_docs/label/2009/084349s060lbl.pdf) Accessed on 01 April 2021.
- Available online: [https://www.accessdata.fda.gov/drugsatfda\\_docs/label/2017/208878Orig1s000lbl.pdf](https://www.accessdata.fda.gov/drugsatfda_docs/label/2017/208878Orig1s000lbl.pdf) Accessed on 01 April 2021.
- Lingamchetty, T.N.; Hosseini, S.A.; Saadabadi, A. Midazolam. StatPearls. In *Treasure Island (FL)*; 2021.
- Available online: [https://www.accessdata.fda.gov/drugsatfda\\_docs/label/2011/020051s017lbl.pdf](https://www.accessdata.fda.gov/drugsatfda_docs/label/2011/020051s017lbl.pdf) Accessed on 01 April 2021.
- Available online: [https://www.accessdata.fda.gov/drugsatfda\\_docs/label/2012/020741s040lbl.pdf](https://www.accessdata.fda.gov/drugsatfda_docs/label/2012/020741s040lbl.pdf) Accessed on 01 April 2021.
- Foley, K.F.; DeSanty, K.P.; Kast, R.E. Bupropion: Pharmacology and therapeutic applications. *Expert Rev. Neurother.* **2006**, *6*, 1249–1265.
- Shin, J.M.; Kim, N. Pharmacokinetics and pharmacodynamics of the proton pump inhibitors. *J. Neurogastroenterol. Motil.* **2013**, *19*, 25–35.
- Lennernas, H. Clinical pharmacokinetics of atorvastatin. *Clin. Pharmacokinet.* **2003**, *42*, 1141–1160.
- Available online: [https://www.accessdata.fda.gov/drugsatfda\\_docs/label/2017/020356s027lbl.pdf](https://www.accessdata.fda.gov/drugsatfda_docs/label/2017/020356s027lbl.pdf) Accessed on 01 April 2021.
- Russell, G.; Graveley, R.; Seid, J.; al-Humidan, A.K.; Skjodt, H. Mechanisms of action of cyclosporine and effects on connective tissues. *Semin. Arthritis Rheum.* **1992**, *21* (Suppl. 3), 16–22.

18. Available online:  
[https://www.accessdata.fda.gov/drugsatfda\\_docs/label/2018/210115s000,050708s047,050709s040lbl.pdf](https://www.accessdata.fda.gov/drugsatfda_docs/label/2018/210115s000,050708s047,050709s040lbl.pdf) Accessed on 01 April 2021.).
19. Available online: [https://www.accessdata.fda.gov/drugsatfda\\_docs/label/2010/020839s048lbl.pdf](https://www.accessdata.fda.gov/drugsatfda_docs/label/2010/020839s048lbl.pdf) Accessed on 01 April 2021.
20. Babenko, A.P.; Gonzalez, G.; Bryan, J. The tolbutamide site of SUR1 and a mechanism for its functional coupling to K(ATP) channel closure. *FEBS Lett.* **1999**, *459*, 367–376.
21. Available online: [https://www.accessdata.fda.gov/drugsatfda\\_docs/label/2010/021879s000lbl.pdf](https://www.accessdata.fda.gov/drugsatfda_docs/label/2010/021879s000lbl.pdf) Accessed on 01 April 2021.
22. Schadel, M.; Wu, D.; Otton, S V.; Kalow, W.; Sellers, E.M. Pharmacokinetics of dextromethorphan and metabolites in humans: Influence of the CYP2D6 phenotype and quinidine inhibition. *J. Clin. Psychopharmacol.* **1995**, *15*, 263–269.
23. Ono, S.; Hatanaka, T.; Hotta, H.; Tsutsui, M.; Satoh, T.; Gonzalez, F.J. Chlorzoxazone is metabolized by human CYP1A2 as well as by human CYP2E1. *Pharmacogenetics* **1995**, *5*, 143–150.
24. Available online: [https://www.accessdata.fda.gov/drugsatfda\\_docs/label/2019/022307s016lbl.pdf](https://www.accessdata.fda.gov/drugsatfda_docs/label/2019/022307s016lbl.pdf) Accessed on 01 April 2021.
25. Dobesh, P.P.; Oestreich, J.H. Ticagrelor: Pharmacokinetics, pharmacodynamics, clinical efficacy, and safety. *Pharmacotherapy* **2014**, *34*, 1077–1090.
